# Supplementary material for: Determinants of Leukocyte Margination in Rectangular Microchannels
Source: PLOS journal article supplement (doi:10.1371/journal.pone.0007104), 2009-09-18
Supplement: S1 (10.1371/journal.pone.0007104.s001) [file journal.pone.0007104.s001]

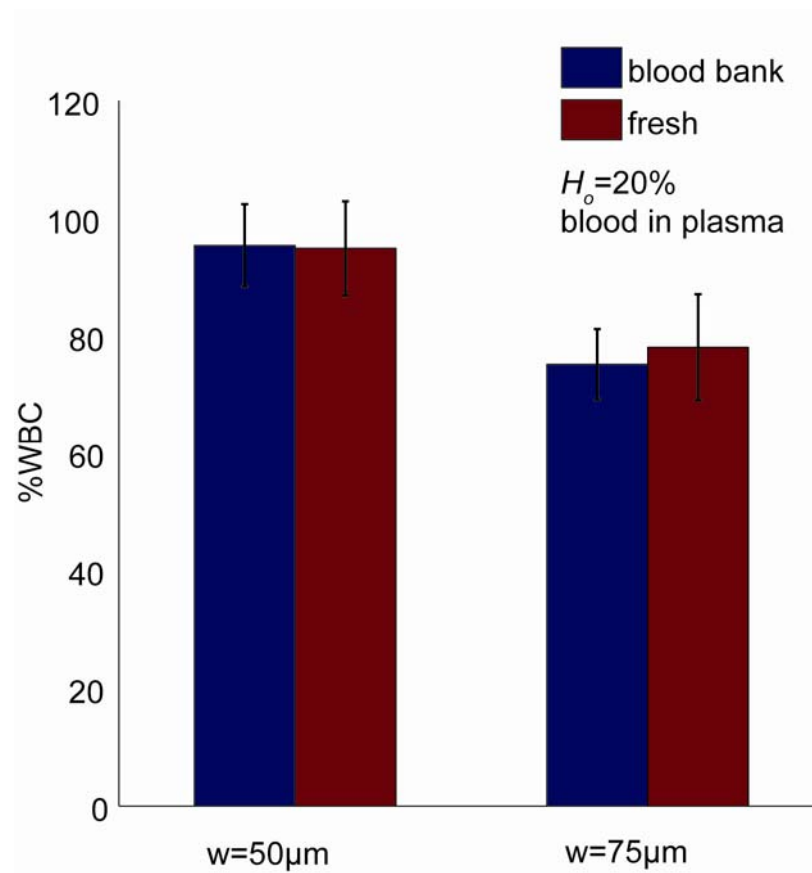

**Figure S1.** WBC margination in freshly drawn and 48 hour-old banked blood stored at 4°C in 50 and 75 μm channels.
