# Supplementary material for: Determinants of Leukocyte Margination in Rectangular Microchannels
Source: PLOS journal article supplement (doi:10.1371/journal.pone.0007104), 2009-09-18
Supplement: S2 (10.1371/journal.pone.0007104.s002) [file journal.pone.0007104.s002]

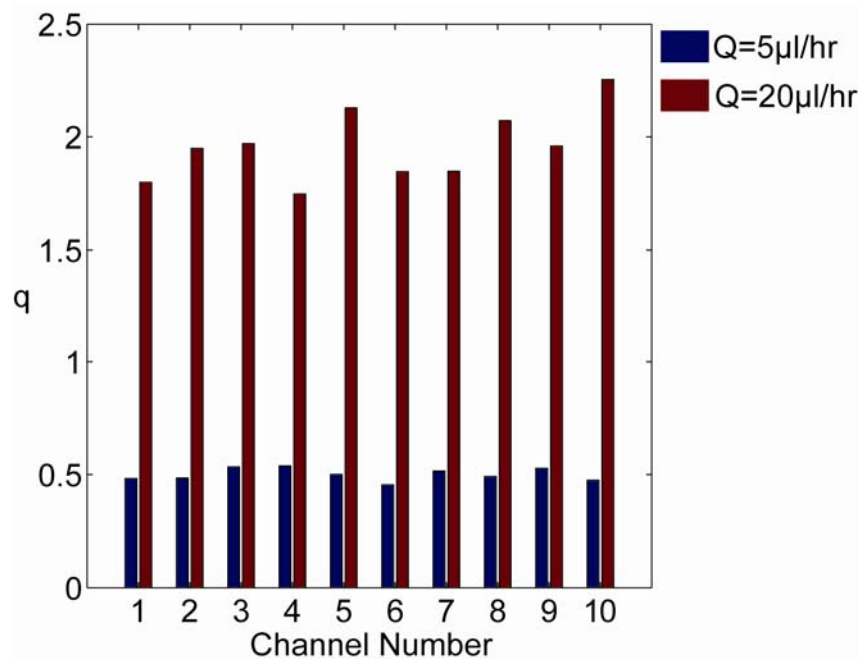

**Figure S2.** Channel flow rates ( $q$ ) for 2 different input flow rates ( $Q$ ) in an array of ten  $50\mu\text{m}$  wide channels.
